# Supplementary material for: Microencapsulation of olive mill wastewater in Saccharomyces cerevisiae cells by spray drying and in vitro bioaccessibility of phenolic compounds
Source: Royal Society of Chemistry journal article supplement (doi:10.1039/d2fo03872b), 2023-01-01
Supplement: d2fo03872b1.pdf [file d2fo03872b1.pdf]

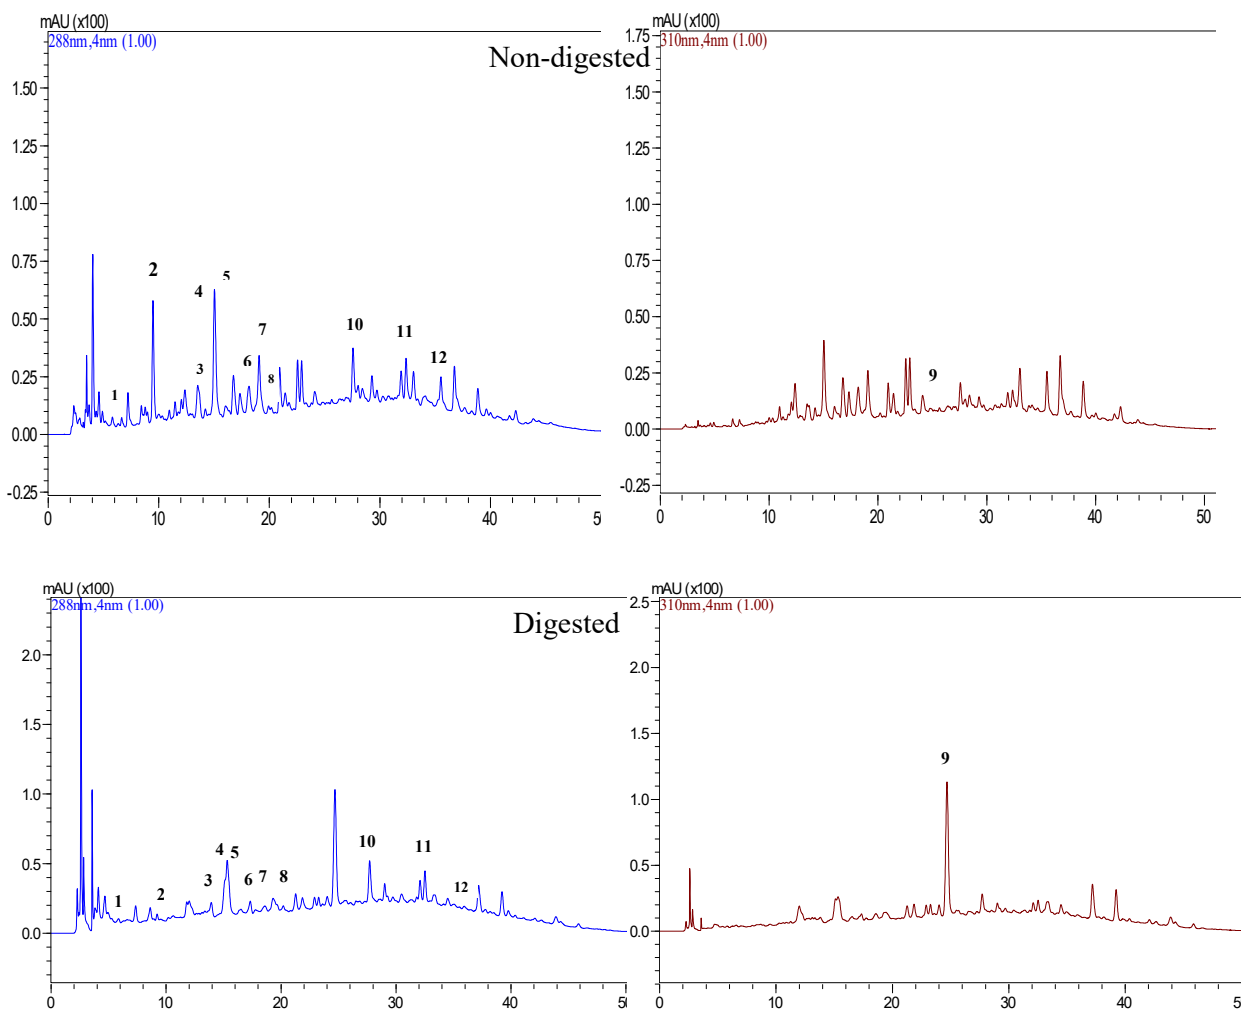

**Fig S1.** The HPLC chromatogram of non-digested and digested (SIF) YCs-OMW samples at 288 and 310 nm. 1:gallic acid (5.9min); 2:hydroxytyrosol (9.7 min); 3: tyrosol (14.1 min); 4: p-hydroxybenzoic acid (15.3 min); 5: catechin (15.5 min); 6: vanillic acid (17.4 min); 7: 3-hydroxybenzoic acid (18.9 min); 8: Epicatechin (20.2 min); 9: p-coumaric acid (24.8 min); 10: rutin (27.8 min); 11: o-coumaric acid (32.6 min); oleuropein (36.02 min)
