# Supplementary material for: Microencapsulation of olive mill wastewater in Saccharomyces cerevisiae cells by spray drying and in vitro bioaccessibility of phenolic compounds
Source: Royal Society of Chemistry journal article supplement (doi:10.1039/d2fo03872b), 2023-01-01
Supplement: d2fo03872b2.xlsx [file d2fo03872b2.xlsx]

## Sheet: Calibration Equation
	Gallic acid	y=9,9837x-0,0058	R2=0,9911	0,01-0,11	mg/Ml
	Tyrosol	y=0,0054x+0,0755	R2=0,9939	40-160	mg/L
	Hydroxytyrosol	y=0,0106x-0,0704	R2=0,9877	30-80	mg/L

## Sheet: Table-1 color,moisture,aw,yield
		L	a	b	Moisture(%)	aw	Yield(%)
	YCs	91.6	0.33	10.02	4.625	0.255	80.9
	YCs	91.51	0.33	9.94	4.895	0.26	77.08
	YCs	91.75	0.32	10.09	4.76	0.257	81.58
	YCs-HPH	92.59	-0.34	9.09	2.86	0.24	81.45
	YCs-HPH	92.44	-0.35	9	3.12	0.237	85.23
	YCs-HPH	92.52	-0.34	9.01	2.99	0.239	78
	YCs-OMW	66.95	3.47	27.1	5.025	0.252	24.7
	YCs-OMW	66.55	3.42	26.69	5.24	0.246	30.47
	YCs-OMW	66.27	3.38	26.36	5.133	0.249	27.58
	YCs-OMW-HPH	72.66	2.57	28.27	3.522	0.231	29.2
	YCs-OMW-HPH	71.96	2.63	28.04	3.925	0.234	36.8
	YCs-OMW-HPH	73.01	2.54	28.32	3.724	0.232	32.7

## Sheet: Table-2 YCs-OMW-HPH in vitro
			Unit:mg/100g
			Gallic Acid	3-hydroxybenzoic acid	p-hydroxybenzoic acid	Vanilic Acid	p-coumaric acid	o-coumaric acid	Catechin	Epicatechin	Rutin	Hydroxytyrosol	Tyrosol	Oeuropein	TPC GAE	TPC TyE	TPC HyTE
		Initial	24.34	48.93	14.89	32.68	1.55	13.94	97.12	31.01	98.13	320.74	270.37	124.94	3987.97	7085.8	4022.67
		Initial	29.88	57.3	15.09	35.03	1.3	14.69	106.03	23.52	89.02	314.45	300.74	123.58	4011.47	7062.65	4010.88
		Initial	27.11	53.11	14.99	33.85	1.42	14.31	101.57	27.26	93.57	317.6	285.55	124.26	4083.48	7108.95	4034.47
		SSF	12.17	25.69	22.11	24.71	17.62	25.92	233.75	151.88	181.24	320.42	232.51	150.71	2140.29	3053.7	2381.51
		SSF	14.09	20.75	24.02	26.44	18.5	28.02	243.16	151.92	190.27	324.56	233.33	145.54	2024.1	2838.89	2272.08
		SSF	15.8	30.5	23.07	20.18	18.83	28.81	238.45	158.57	197.16	347.46	242.65	190.49	1479.21	2946.3	2326.79
		SGF	29.19	56.09	14.8	24.3	6.59	10.31	236.94	92.37	95.07	228.04	205.12	73.98	4632.11	7480	4801.58
		SGF	36.25	42.5	22.4	26.64	6.44	11.27	261.6	88.85	116.86	235.57	207.2	137.76	4053.37	6410	4256.49
		SGF	16.88	52.45	16.24	21.96	6.3	12.23	249.27	85.33	108.15	243.1	209.29	105.87	4514.92	7263.33	4691.21
		SIF	25.83	16.41	17	21.63	62.33	18.06	252.27	93.32	134.73	79.77	347.12	155.72	3240.36	4771.39	3545.6
		SIF	34.67	24.63	22.44	23.99	57.22	18.17	219.55	98.25	125.01	88.64	342.97	151.52	3182.37	4664.17	3490.98
		SIF	30.25	20.52	19.72	18.16	55.63	18.2	238.75	98.15	117.47	65.03	345.05	151.95	3627.19	5486.57	3909.94
		NBF	-	-	-	0.93	1.47	-	1.03	1.06	2.66	0.84	11.73	2.81	173.4	260.37	187.7
		NBF	-	-	-	0.69	1.07	-	0.86	0.89	2.11	1.1	8.4	2.93	199.04	307.78	211.85
		NBF	-	-	-	0.81	1.36	-	0.94	0.97	2.43	0.97	10.07	2.87	215.87	338.89	227.7

## Sheet: Table-2 YCs-OMW in vitro
			Unit:mg/L
			Gallic Acid	3-hydroxybenzoic acid	p-hydroxybenzoic acid	Vanilic Acid	p-coumaric acid	o-coumaric acid	Catechin	Epicatechin	Rutin	Hydroxytyrosol	Tyrosol	Oeuropein	TPC GAE	TPC TyE	TPC HyTE
		Initial	17.12	36.57	11.61	19.29	3.48	15.4	93.42	98.78	116.08	352.25	280.32	84.75	5853.61	10370.7	5696.1
		Initial	10.02	30.71	15.92	22.11	4.62	16.56	106.94	60.75	87.99	346.36	275.78	95.09	5663.3	10018.8	5516.86
		Initial	13.57	33.64	13.77	20.7	4.05	15.98	100.18	79.77	102.04	349.3	278.05	89.92	5177.51	9120.68	5059.31
		SSF	7.57	37.37	16.18	39.17	21.66	34.09	249.96	75.19	223.2	349.53	256.41	196.32	4360.87	6978.52	4546.11
		SSF	12.37	34.8	20.09	34.36	16.35	28.41	234.97	74.75	183.9	300.34	224.79	150.23	4332.82	6926.67	4519.7
		SSF	10.88	31.15	15.51	25.68	19.01	23.51	266.78	75.56	157.35	324.94	192.98	173.27	3357.63	6342.96	4532.91
		SGF	17.26	50.37	16.02	17.1	10.33	17.88	339.78	77.71	136.72	300.11	186.78	197	4005.41	6185.83	4266.17
		SGF	24.19	75.08	19.46	21.89	11.51	20.17	418.98	91.97	146.4	359.94	278.8	150.62	3527.63	5302.5	3816.17
		SGF	21.36	47.22	21.39	26.68	11.59	18.23	338.35	84.84	138.61	290.24	245.41	108.93	3889.12	5970.83	4156.64
		SIF	0	24.51	27.31	9.82	55.52	11.81	181.12	116.22	120.76	61.46	289.69	198.29	3711.55	5356.48	4105.19
		SIF	0	18.56	32.22	12.06	45.9	13.45	127.86	130.4	122.34	37.62	289.9	144.18	3722.17	5376.11	4115.19
		SIF	0	21.67	29.34	11.83	49.8	12.63	150.3	113.42	118.82	49.54	285.61	168.83	3749.41	5426.48	4140.85
		NBF	0	3.26	0.26		1.39		5.66		2.85		9.62	2.91	139.35	197.41	155.62
		NBF	0	2.64	0.32		1.06		5.18		1.61		8	2	131.33	182.59	148.08
		NBF	0	2.95	0.29		1.02		5.42		1.8		6.65	2.46	135.74	190.74	152.23

## Sheet: Table-2 OMW-in vitro
		Unit:mg/100g
		Gallic Acid	3-hydroxybenzoic acid	p-hydroxybenzoic acid	Vanilic Acid	p-coumaric acid	o-coumaric acid	Catechin	Epicatechin	Rutin	Hydroxytyrosol	Tyrosol	Oeuropein	TPC GAE	TPC TyE	TPC HyTE
	Initial	0.8	14.09	11.25	2.95	13.5	1.04	142.71	17.5	29.77	244.25	94.36	26.59	3514.73	5745.37	3615.09
	Initial	1.4	14.92	11.74	3	13.8	1.08	142.5	22.07	33.35	247.81	102.32	22.46	3499.7	5717.59	3600.94
	Initial	0.99	14.51	11.14	3.45	12.92	0.36	133.14	16.17	30.11	232.87	93.12	19.05	3354.47	5449.07	3464.15
	SSF	0.62	15.95	8.92	7.67	20.53	8.45	233.42	44.33	63.72	234.71	132.8	73.35	1484.02	2442.59	1519.62
	SSF	1.08	24.56	8.6	7.99	18.81	8.01	197.77	49.67	44.9	183.5	139.38	63.93	1536.1	2538.89	1568.68
	SSF	0.85	20.26	8.76	7.83	19.67	8.23	215.6	47	54.31	209.11	136.09	68.64	1510.06	2490.74	1544.15
	SGF	0	13.1	2.06	2.79	12.83	0	161.3	5.83	37.8	300.52	71.67	26.38	1552.93	2419.44	1645.47
	SGF	0	12.77	2.46	2.99	11.55	0	121.55	6.02	38.84	295.25	83.99	20.98	1718.2	2725	1801.13
	SGF	0	12.94	2.26	2.89	12.19	0	141.42	5.93	38.32	297.89	77.83	23.68	1635.57	2572.22	1723.3
	SIF	0	3.48	0	0	47.12	0	182.1	0	9.88		177.93		3108.47	4542.59	3415.28
	SIF	0	2.99	0	0	43.94	0	126.39	0	14.14		152.44		3614.29	5477.78	3891.7
	SIF	0	3.24	0	0	45.53	0	154.25	0	12.01		165.19		3361.38	5010.19	3653.49

## Sheet: Figure 1 %EE-EY
				GAE	HYTE	TE
			YCs-OMW	5.85	5.7	10.37
			YCs-OMW	5.66	5.515	10.02
		%EY	YCs-OMW	5.18	5.055	9.12
			YCs-OMW-HPH	3.93	4.02	7.09
			YCs-OMW-HPH	4.06	4.01	7.06
			YCs-OMW-HPH	4.09	4.03	7.11
				GAE	HYTE	TE
		%EE	YCs-OMW	49.3207	47.74	51.4687
			YCs-OMW	47.6176	46.04	49.7643
			YCs-OMW	47.7027	41.16	44.8174
			YCs-OMW-HPH	39.2244	37.38	44.2411
			YCs-OMW-HPH	41.2463	39.37	44.0589
			YCs-OMW-HPH	41.6061	39.72	44.4232
